# Supplementary material for: Atmospheric chemistry of CF3(CX2)2CH2OH: rate coefficients and temperature dependence of reactions with chlorine atoms and the subsequent pathways of alkyl and alkoxy radicals (X = H, F)
Source: Royal Society of Chemistry journal article supplement (doi:10.1039/c6ra10840g), 2016-01-01
Supplement: c6ra10840g1.pdf [file c6ra10840g1.pdf]

**Table S1.** Calculated frequencies (in  $\text{cm}^{-1}$ ) for the reactants, products, transition states, and complexes for the title reactions at the B3LYP/6-311G(d,p) level.

| species | B3LYP/6-311G(d,p)                                                                                                                                                                                                                     |
|---------|---------------------------------------------------------------------------------------------------------------------------------------------------------------------------------------------------------------------------------------|
| R1      | 65, 71, 122, 149, 270, 278, 322, 362, 469, 533, 568, 648, 777, 838, 874, 1021, 1040, 1050, 1077, 1147, 1185, 1245, 1251, 1268, 1317, 1333, 1339, 1418, 1467, 1483, 1509, 1530, 2958, 2985, 3047, 3057, 3083, 3105, 3843               |
| R2      | 36, 70, 102, 128, 210, 222, 235, 288, 309, 323, 333, 372, 380, 423, 508, 529, 538, 596, 650, 733, 777, 908, 942, 1097, 1121, 1134, 1156, 1183, 1219, 1225, 1267, 1288, 1345, 1402, 1436, 1497, 3022, 3129, 3819                       |
| HCl     | 2929                                                                                                                                                                                                                                  |
| P1      | 67, 68, 122, 135, 257, 272, 331, 362, 478, 533, 572, 647, 768, 837, 914, 1020, 1055, 1056, 1072, 1155, 1217, 1265, 1284, 1294, 1341, 1354, 1400, 1421, 1481, 1504, 2881, 2889, 3045, 3055, 3081, 3103                                 |
| P2      | 58, 70, 117, 126, 276, 327, 356, 370, 466, 532, 563, 593, 649, 787, 837, 985, 1031, 1057, 1110, 1144, 1201, 1229, 1252, 1268, 1328, 1330, 1407, 1458, 1481, 1494, 2956, 3048, 3057, 3101, 3103, 3843                                  |
| P3      | 47, 55, 79, 210, 257, 276, 325, 362, 430, 511, 529, 567, 664, 812, 869, 923, 1020, 1055, 1132, 1134, 1143, 1219, 1248, 1264, 1307, 1348, 1370, 1462, 1464, 1493, 2903, 2945, 3031, 3089, 3191, 3841                                   |
| P4      | 38, 50, 98, 168, 260, 270, 322, 326, 461, 470, 567, 588, 654, 793, 855, 1002, 1028, 1069, 1084, 1122, 1151, 1211, 1244, 1260, 1305, 1331, 1437, 1463, 1472, 1528, 2959, 2969, 3006, 3075, 3191, 3843                                  |
| P5      | 29, 72, 93, 131, 213, 221, 233, 287, 301, 326, 333, 375, 396, 508, 530, 534, 597, 647, 711, 756, 896, 1017, 1059, 1119, 1159, 1166, 1211, 1221, 1255, 1275, 1324, 1345, 1510, 1520, 2976, 3048                                        |
| P6      | 41, 62, 85, 141, 206, 225, 234, 287, 298, 322, 336, 365, 378, 460, 517, 531, 546, 584, 599, 655, 733, 783, 928, 1004, 1113, 1151, 1167, 1202, 1219, 1229, 1275, 1336, 1363, 1474, 3260, 3767                                          |
| TS1     | 1113i, 21, 33, 78, 116, 128, 173, 276, 324, 361, 436, 467, 533, 566, 648, 754, 829, 838, 907, 976, 1000, 1037, 1050, 1127, 1151, 1166, 1207, 1255, 1264, 1315, 1340, 1360, 1411, 1425, 1482, 1506, 2900, 3026, 3050, 3062, 3091, 3114 |
| TS2     | 277i, 26, 46, 83, 130, 135, 178, 285, 327, 362, 441, 467, 533, 565, 643, 660, 778, 841, 902, 948, 978, 1027, 1060, 1099, 1156, 1180, 1206, 1242, 1261, 1272, 1334, 1345, 1420, 1460, 1480, 1492, 3007, 3048, 3060, 3079, 3112, 3813   |
| TS3     | 463i, 26, 59, 85, 118, 143, 156, 282, 322, 353, 395, 471, 528, 556, 624, 646, 757, 839, 852, 898, 917, 1048, 1065, 1086, 1110, 1164, 1184, 1236, 1266, 1282, 1303, 1400, 1409, 1425, 1455, 1476, 2973, 3002, 3008, 3073, 3127, 3793   |
| TS4     | 690i, 45, 66, 74, 81, 115, 173, 270, 281, 321, 340, 449, 509, 540, 569, 660, 751, 824, 845, 874, 964, 1022, 1070, 1092, 1115, 1160, 1182, 1221, 1259, 1270, 1302, 1324, 1416, 1456, 1471, 1531, 2969, 2972, 3027, 3076, 3131, 3846    |
| TS5     | 1194i, 18, 31, 33, 71, 119, 142, 212, 215, 228, 284, 305, 324, 332, 375, 391, 428, 506, 529, 538, 596, 649, 733, 775, 829, 894, 908, 1010, 1119, 1126, 1157, 1170, 1182, 1217, 1224, 1257, 1289, 1340, 1369, 1404, 2964, 3061         |

|     |                                                                                                                                                                                                                                       |
|-----|---------------------------------------------------------------------------------------------------------------------------------------------------------------------------------------------------------------------------------------|
| TS6 | 847i, 23, 49, 62, 75, 130, 161, 210, 227, 240, 281, 291, 325, 336, 369, 379, 422, 502, 530, 541, 587, 604, 657, 736, 789, 910, 919, 1031, 1103, 1125, 1161, 1172, 1184, 1201, 1222, 1229, 1283, 1328, 1339, 1439, 3163, 3750          |
| ER1 | 25, 40, 80, 117, 126, 159, 258, 282, 323, 362, 452, 485, 533, 569, 648, 773, 837, 869, 1002, 1024, 1039, 1061, 1147, 1177, 1232, 1246, 1267, 1318, 1329, 1343, 1414, 1447, 1484, 1498, 1516, 2999, 3049, 3051, 3062, 3088, 3112, 3800 |
| ER2 | 29, 46, 82, 128, 135, 158, 280, 314, 340, 362, 435, 482, 532, 573, 649, 754, 835, 846, 981, 1019, 1028, 1058, 1115, 1149, 1159, 1197, 1236, 1261, 1271, 1331, 1343, 1351, 1420, 1453, 1480, 1493, 3018, 3028, 3059, 3088, 3112, 3810  |
| ER5 | 24, 35, 49, 75, 99, 118, 171, 217, 227, 235, 288, 329, 333, 348, 380, 397, 504, 519, 532, 543, 596, 651, 732, 778, 908, 941, 1070, 1122, 1130, 1162, 1183, 1218, 1226, 1254, 1286, 1342, 1380, 1424, 1496, 3068, 3156, 3774           |
| EP1 | 6, 26, 66, 76, 89, 130, 162, 274, 341, 361, 375, 481, 532, 547, 576, 593, 648, 780, 838, 946, 1016, 1054, 1061, 1067, 1160, 1217, 1264, 1280, 1297, 1340, 1348, 1399, 1424, 1481, 1504, 2635, 2877, 2896, 3047, 3058, 3085, 3107      |
| EP2 | 26, 36, 70, 87, 122, 125, 192, 279, 328, 360, 436, 473, 532, 569, 640, 650, 701, 768, 835, 840, 998, 1029, 1061, 1128, 1153, 1211, 1234, 1257, 1269, 1332, 1341, 1417, 1461, 1480, 1491, 1982, 2987, 3057, 3065, 3080, 3108, 3822     |
| EP3 | 14, 55, 64, 72, 80, 96, 194, 266, 287, 295, 329, 356, 434, 475, 524, 530, 566, 643, 820, 867, 922, 1034, 1062, 1103, 1129, 1164, 1195, 1256, 1270, 1306, 1383, 1411, 1432, 1459, 1482, 2870, 2944, 2970, 2979, 3075, 3173, 3792       |
| EP4 | 9, 17, 24, 40, 84, 98, 175, 262, 266, 275, 301, 330, 340, 469, 492, 567, 600, 653, 793, 856, 996, 1031, 1068, 1077, 1103, 1140, 1208, 1248, 1275, 1303, 1328, 1436, 1462, 1470, 1529, 2884, 2953, 2971, 3011, 3084, 3184, 3843        |
| EP5 | 14, 23, 28, 72, 82, 95, 141, 213, 217, 227, 284, 308, 313, 332, 351, 373, 385, 390, 503, 529, 540, 595, 649, 723, 737, 790, 908, 1046, 1083, 1121, 1154, 1185, 1218, 1219, 1257, 1291, 1342, 1350, 1387, 2809, 2949, 2977             |
| EP6 | 22, 33, 44, 56, 65, 84, 142, 151, 207, 211, 228, 242, 287, 292, 325, 337, 367, 379, 451, 513, 529, 545, 585, 599, 654, 731, 779, 927, 1017, 1108, 1142, 1168, 1204, 1220, 1233, 1266, 1332, 1366, 1474, 2908, 3256, 3758              |

**Table S2.** Calculated frequencies (in  $\text{cm}^{-1}$ ) for the species of the subsequent reactions of  $\text{CF}_3(\text{CX}_2)_2\text{C}\cdot\text{HOH}$  ( $\text{X}=\text{H}, \text{F}$ ) at the B3LYP/6-311G(d,p) level.

| species                                                        | B3LYP/6-311G(d,p)                                                                                                                                                                                                                                                 |
|----------------------------------------------------------------|-------------------------------------------------------------------------------------------------------------------------------------------------------------------------------------------------------------------------------------------------------------------|
| $\text{CF}_3(\text{CH}_2)_2\text{C}\cdot\text{HOH}$            | 58, 70, 117, 126, 276, 327, 356, 370, 466, 532, 563, 593, 649, 787, 837, 985, 1031, 1057, 1110, 1144, 1201, 1229, 1252, 1268, 1328, 1330, 1407, 1458, 1481, 1494, 2956, 3048, 3057, 3101, 3103, 3843                                                              |
| $\text{CF}_3(\text{CF}_2)_2\text{C}\cdot\text{HOH}$            | 41,62, 85, 141, 206, 225, 234, 287, 298, 322, 336, 365, 378, 460, 517, 531, 546, 584, 599, 655, 733, 783, 928, 1004, 1113, 1151, 1167, 1202, 1219, 1229, 1275, 1336, 1363, 1474, 3260, 3767                                                                       |
| $\text{O}_2$                                                   | 1626                                                                                                                                                                                                                                                              |
| $\text{HO}_2\cdot$                                             | 1163, 1428, 3605                                                                                                                                                                                                                                                  |
| $\text{NO}$                                                    | 1988                                                                                                                                                                                                                                                              |
| $\text{NO}_2$                                                  | 766, 1399, 1706                                                                                                                                                                                                                                                   |
| $\text{CF}_3\text{CH}_2\text{CH}_2\text{CHO}$                  | 54, 66, 105, 160, 288, 355, 370, 507, 533, 566, 645, 774, 829, 864, 1007, 1033, 1073, 1158, 1161, 1243, 1265, 1297, 1338, 1408, 1421, 1471, 1487, 1825, 2851, 3026, 3056, 3098, 3117                                                                              |
| $\text{CF}_3\text{CF}_2\text{CF}_2\text{CHO}$                  | 20, 57, 71, 142, 209, 222, 237, 262, 287, 329, 351, 371, 415, 500, 528, 572, 598, 653, 724, 774, 866, 1009, 1128, 1135, 1165, 1196, 1213, 1232, 1287, 1344, 1391, 1853, 2965                                                                                      |
| $\text{CF}_3(\text{CH}_2)_2\text{C}(\text{OO}\cdot)\text{HOH}$ | 35, 65, 79, 119, 134, 206, 304, 322, 361, 425, 460, 509, 533, 578, 608, 661, 728, 821, 843, 996, 1035, 1061, 1142, 1150, 1162, 1201, 1241, 1267, 1282, 1335, 1345, 1362, 1422, 1480, 1484, 1496, 3019, 3059, 3068, 3102, 3121, 3781                               |
| $\text{CF}_3(\text{CF}_2)_2\text{C}(\text{OO}\cdot)\text{HOH}$ | 26, 50, 66, 73, 115, 163, 209, 236, 243, 290, 302, 316, 328,, 345, 371, 386, 399, 501, 532, 570, 593, 625, 671, 735, 801, 897, 928, 1122, 1135, 1153, 1175, 1187, 1199, 1223, 1234, 1255, 1304, 1329, 1360, 1481, 3076, 3800                                      |
| $\text{CF}_3(\text{CH}_2)_2\text{C}(\text{OONO})\text{HOH}$    | 23, 40, 51, 70, 124, 134, 212, 218, 268, 326, 357, 370, 392, 431, 452, 529, 533, 580, 608, 658, 763, 835, 841, 874, 940, 1015, 1033, 1063, 1118, 1153, 1160, 1238, 1266, 1281, 1335, 1341, 1390, 1418, 1464, 1481, 1495, 1813, 3006, 3060, 3070, 3106, 3125, 3819 |
| $\text{CF}_3(\text{CF}_2)_2\text{C}(\text{OONO})\text{HOH}$    | 30, 38, 52, 64, 73, 121, 166, 198, 220, 235, 245, 262, 280, 292, 316, 328, 346, 373, 388, 408, 436, 504, 531, 576, 594, 623, 669, 735, 796, 837, 925, 942, 1013, 1119, 1135, 1138, 1175, 1182, 1221, 1228, 1252, 1302, 1333, 1383, 1460, 1854, 3063, 3832         |
| $\text{CF}_3(\text{CH}_2)_2\text{C}(\text{O}\cdot)\text{HOH}$  | 40, 68, 122, 141, 226, 231, 320, 359, 398, 465, 533, 550, 581, 647, 786, 830, 896, 922, 998, 1048, 1065, 1132, 1160, 1178, 1217, 1245, 1265, 1308, 1329, 1340, 1416, 1485, 1500, 2720, 3060, 3075, 3108, 3129, 3812                                               |
| $\text{CF}_3(\text{CF}_2)_2\text{C}(\text{O}\cdot)\text{HOH}$  | 42, 64, 75, 122, 182, 191, 214, 239, 259, 289, 297, 329, 348, 373, 406, 500, 529, 552, 574, 601, 641, 715, 744, 856, 978, 1040,                                                                                                                                   |

|         |                                                                                                                                                                                                                                                  |
|---------|--------------------------------------------------------------------------------------------------------------------------------------------------------------------------------------------------------------------------------------------------|
|         | 1105, 1121, 1169, 1178, 1201, 1210, 1237, 1261, 1289, 1325, 1385, 2935, 3802                                                                                                                                                                     |
| TS-H-O2 | 863 <i>i</i> , 30, 56, 107, 117, 143, 192, 320, 354, 368, 494, 497<br>533, 577, 629, 653, 720, 771, 841, 903, 1012, 1041, 1058, 1086, 1159, 1170, 1248, 1264, 1296, 1305, 1339, 1376, 1420, 1468, 1487, 1609, 1865, 3002, 3027, 3061, 3093, 3115 |
| TS-F-O2 | 837 <i>i</i> , 18, 54, 66, 101, 121, 180, 213, 237, 263, 276, 290, 320, 336, 374, 377, 493, 526, 538, 572, 597, 664, 676, 724, 746, 816, 916, 1009, 1040, 1118, 1135, 1165, 1195, 1220, 1232, 1289, 1308, 1341, 1373, 1626, 1880, 3079           |

**Table S3.** Calculated frequencies (in  $\text{cm}^{-1}$ ) for the species of the subsequent reactions of  $\text{CF}_3(\text{CX}_2)_2\text{C}(\text{O}\bullet)\text{HOH}$  ( $\text{X}=\text{H}, \text{F}$ ) at the B3LYP/6-311G(d,p) level.

| species                                                         | B3LYP/6-311G(d,p)                                                                                                                                                                                                                                   |
|-----------------------------------------------------------------|-----------------------------------------------------------------------------------------------------------------------------------------------------------------------------------------------------------------------------------------------------|
| $\text{CF}_3(\text{CH}_2)_2\text{C}(\text{O}\bullet)\text{HOH}$ | 40, 68, 122, 141, 226, 231, 320, 359, 398, 465, 533, 550, 581, 647, 786, 830, 896, 922, 998, 1048, 1065, 1132, 1160, 1178, 1217, 1245, 1265, 1308, 1329, 1340, 1416, 1485, 1500, 2720, 3060, 3075, 3108, 3129, 3812                                 |
| $\text{CF}_3(\text{CF}_2)_2\text{C}(\text{O}\bullet)\text{HOH}$ | 42, 64, 75, 122, 182, 191, 214, 239, 259, 289, 297, 329, 348, 373, 406, 500, 529, 552, 574, 601, 641, 715, 744, 856, 978, 1040, 1105, 1121, 1169, 1178, 1201, 1210, 1237, 1261, 1289, 1325, 1385, 2935, 3802                                        |
| $\text{O}_2$                                                    | 1626                                                                                                                                                                                                                                                |
| $\text{HO}_2\bullet$                                            | 1163, 1428, 3605                                                                                                                                                                                                                                    |
| $\text{CF}_3(\text{CH}_2)_2\text{C}(\text{O})\text{OH}$         | 23, 64, 104, 122, 221, 330, 357, 471, 523, 533, 569, 602, 666, 670, 796, 837, 897, 992, 1073, 1129, 1141, 1175, 1238, 1264, 1303, 1332, 1377, 1438, 1469, 1481, 1829, 3054, 3080, 3086, 3125, 3758                                                  |
| $\text{CF}_3(\text{CF}_2)_2\text{C}(\text{O})\text{OH}$         | 20, 45, 63, 120, 179, 210, 228, 255, 286, 328, 342, 370, 374, 449, 515, 544, 555, 588, 605, 659, 674, 752, 771, 925, 1122, 1144, 1164, 1175, 1201, 1214, 1234, 1270, 1330, 1397, 1865, 3749                                                         |
| $\text{CF}_3\text{CH}_2\text{CH}_2\bullet$                      | 44, 108, 216, 351, 402, 514, 530, 542, 655, 792, 817, 1021, 1076, 1140, 1188, 1249, 1321, 1347, 1462, 1475, 3043, 3090, 3153, 3261                                                                                                                  |
| $\text{CF}_3\text{CF}_2\text{CF}_2\bullet$                      | 26, 75, 136, 200, 222, 272, 338, 364, 369, 499, 513, 542, 596, 635, 672, 762, 1011, 1147, 1179, 1206, 1213, 1279, 1300, 1360                                                                                                                        |
| $\text{HC}(\text{O})\text{OH}$                                  | 632, 701, 1058, 1132, 1310, 1411, 1836, 3043, 3736                                                                                                                                                                                                  |
| $\text{CF}_3\text{CH}_2\text{CH}_2\text{CHO}$                   | 54, 66, 105, 160, 288, 355, 370, 507, 533, 566, 645, 774, 829, 864, 1007, 1033, 1073, 1158, 1161, 1243, 1265, 1297, 1338, 1408, 1421, 1471, 1487, 1825, 2851, 3026, 3056, 3098, 3117                                                                |
| $\text{CF}_3\text{CF}_2\text{CF}_2\text{CHO}$                   | 20, 57, 71, 142, 209, 222, 237, 262, 287, 329, 351, 371, 415, 500, 528, 572, 598, 653, 724, 774, 866, 1009, 1128, 1135, 1165, 1196, 1213, 1232, 1287, 1344, 1391, 1853, 2965                                                                        |
| $\bullet\text{OH}$                                              | 3704                                                                                                                                                                                                                                                |
| $\text{TS1O}_2$                                                 | 480i, 28, 42, 67, 111, 123, 130, 160, 218, 291, 347, 360, 391, 452, 519, 533, 559, 621, 649, 744, 798, 841, 924, 1013, 1038, 1076, 1120, 1134, 1158, 1196, 1240, 1266, 1307, 1331, 1340, 1415, 1484, 1497, 1539, 1747, 3060, 3070, 3109, 3128, 3790 |
| $\text{TS2O}_2$                                                 | 685i, 31, 53, 55, 73, 116, 134, 166, 195, 216, 238, 255, 271, 289, 307, 334, 357, 365, 382, 445, 507, 532, 571, 596, 625, 679, 697, 738, 802, 891, 1060, 1118, 1127, 1153, 1180, 1183, 1212, 1230, 1284, 1289, 1326, 1346, 1547, 1703, 3793         |
| $\text{TS1C-H}$                                                 | 1040i, 40, 68, 122, 138, 224, 323, 359, 447, 512, 532, 543, 561, 572, 626, 677, 683, 800, 837, 906, 994, 1068, 1116, 1135, 1164, 1238, 1263, 1297, 1328, 1360, 1425, 1477, 1488, 1653, 3046, 3070, 3107, 3125, 3765                                 |
| $\text{TS2C-H}$                                                 | 963i, 36, 68, 76, 123, 191, 213, 235, 265, 288, 308, 328, 360, 372, 416,                                                                                                                                                                            |

|        |                                                                                                                                                                                                                      |
|--------|----------------------------------------------------------------------------------------------------------------------------------------------------------------------------------------------------------------------|
|        | 492, 515, 533, 558, 563, 596, 605, 668, 686, 745, 800, 902, 1110, 1132, 1147, 1165, 1183, 1220, 1228, 1293, 1326, 1359, 1707, 3761                                                                                   |
| TS1C-C | 455i, 30, 53, 105, 124, 215, 247, 343, 360, 418, 530, 535, 552, 600, 645, 719, 824, 827, 943, 1026, 1049, 1074, 1098, 1160, 1204, 1256, 1276, 1319, 1341, 1369, 1475, 1480, 1536, 2956, 3063, 3116, 3120, 3211, 3767 |
| TS2C-C | 453i, 40, 57, 70, 109, 177, 199, 219, 236, 241, 286, 310, 342, 372, 383, 468, 505, 530, 578, 595, 605, 672, 689, 769, 947, 1053, 1102, 1150, 1190, 1205, 1209, 1247, 1274, 1296, 1302, 1332, 1492, 2978, 3767        |
| TS1C-O | 337i, 35, 56, 98, 112, 212, 227, 280, 361, 370, 423, 516, 537, 555, 650, 766, 800, 836, 932, 977, 1033, 1055, 1149, 1161, 1240, 1265, 1298, 1334, 1392, 1407, 1479, 1493, 1593, 2948, 3055, 3070, 3102, 3131, 3729   |
| TS2C-O | 319i, 23, 56, 66, 104, 180, 193, 207, 227, 237, 259, 286, 330, 356, 363, 391, 431, 504, 530, 585, 599, 671, 708, 747, 782, 888, 994, 1123, 1148, 1166, 1198, 1211, 1233, 1276, 1339, 1376, 1635, 3011, 3718          |

**Table S4.** The B3LYP/6-311G(d,p) electronic energies, CCSD(T)/6-311++G(d,p) energies, ZPE, thermal correction to the enthalpy (TZPE<sub>H</sub>), and Gibbs free energy (TZPE<sub>G</sub>) (in a.u.).

| Speices | TZPE <sub>H</sub> | TZPE <sub>G</sub> | B3LYP        | CCSD(T)//B3LYP |
|---------|-------------------|-------------------|--------------|----------------|
| R1+Cl   | 0.126139          | 0.064163          | -991.720618  | -989.993451    |
| TS1     | 0.117795          | 0.067132          | -991.717987  | -989.973214    |
| TS2     | 0.119277          | 0.06937           | -991.736772  | -989.997821    |
| TS3     | 0.118124          | 0.068277          | -991.721982  | -989.987124    |
| TS4     | 0.117859          | 0.067536          | -991.714054  | -989.979299    |
| P1+HCl  | 0.118334          | 0.052473          | -991.716071  | -989.980218    |
| P2+HCl  | 0.119913          | 0.05396           | -991.729098  | -989.99565     |
| P3+HCl  | 0.119123          | 0.052517          | -991.718781  | -989.986558    |
| P4+HCl  | 0.119412          | 0.052369          | -991.717092  | -989.983726    |
| R2+Cl   | 0.096693          | 0.028166          | -1388.767691 | -1386.307587   |
| TS5     | 0.087975          | 0.029907          | -1388.756005 | -1386.279946   |
| TS6     | 0.089559          | 0.032994          | -1388.770992 | -1386.298815   |
| P5+HCl  | 0.091357          | 0.019262          | -1388.751383 | -1386.284598   |
| P6+HCl  | 0.090564          | 0.018055          | -1388.776839 | -1386.307557   |

**Table S5.** The Cartesian coordinates of reactants, products, transition states for the title reactions at the B3LYP/6-311G(d,p) level..

|     |          |           |           |           |
|-----|----------|-----------|-----------|-----------|
| R1  | C        | -1.432667 | 0.008808  | 0.000056  |
|     | C        | -0.106184 | 0.728356  | 0.000008  |
|     | C        | 1.094524  | -0.220752 | -0.000046 |
|     | H        | -0.097075 | 1.375052  | -0.881943 |
|     | H        | -0.097005 | 1.375039  | 0.881967  |
|     | C        | 2.417697  | 0.530297  | -0.000116 |
|     | H        | 1.059897  | -0.868225 | 0.879633  |
|     | H        | 1.059807  | -0.868241 | -0.879709 |
|     | H        | 2.479115  | 1.176540  | -0.888693 |
|     | H        | 2.479163  | 1.176618  | 0.888402  |
|     | F        | -2.464756 | 0.882641  | 0.000092  |
|     | F        | -1.582956 | -0.782010 | 1.087025  |
|     | F        | -1.583037 | -0.782014 | -1.086897 |
|     | O        | 3.456485  | -0.441593 | -0.000101 |
| H   | 4.300735 | 0.018151  | -0.000240 |           |
| TS1 | C        | -0.916846 | -0.666758 | 1.886763  |
|     | C        | -0.125601 | 0.368260  | 1.120470  |
|     | C        | 1.171810  | -0.194553 | 0.534120  |
|     | H        | -0.781008 | 0.750897  | 0.333437  |
|     | H        | 0.076554  | 1.190056  | 1.813030  |
|     | C        | 1.937199  | 0.873065  | -0.258997 |
|     | H        | 1.816085  | -0.577643 | 1.328005  |
|     | H        | 0.948755  | -1.024143 | -0.141244 |
|     | H        | 1.335280  | 1.306606  | -1.067243 |
|     | H        | 2.217666  | 1.697003  | 0.426703  |
|     | F        | -2.050278 | -0.135494 | 2.390602  |
|     | F        | -0.212729 | -1.169705 | 2.925486  |
|     | F        | -1.272917 | -1.709304 | 1.105688  |
|     | O        | 3.162764  | 0.415363  | -0.723242 |
|     | H        | 3.150287  | 0.131715  | -1.967904 |
|     | Cl       | 2.794435  | -0.618364 | -3.154004 |
| TS2 | C        | -1.435420 | -0.117612 | -0.208299 |
|     | C        | -0.107239 | 0.598998  | -0.158851 |
|     | C        | 1.078165  | -0.371514 | -0.155069 |
|     | H        | -0.072353 | 1.260803  | -1.028545 |
|     | H        | -0.105339 | 1.225236  | 0.735551  |
|     | C        | 2.402770  | 0.327769  | -0.245929 |
|     | H        | 1.064020  | -0.987356 | 0.748058  |
|     | H        | 0.995833  | -1.059610 | -1.006879 |
|     | H        | 2.516847  | 1.102546  | -1.010861 |
|     | H        | 2.451942  | 1.233592  | 0.927599  |
|     | F        | -2.461794 | 0.756445  | -0.197063 |



|     |    |           |           |           |
|-----|----|-----------|-----------|-----------|
|     | F  | -1.601351 | -0.949839 | 0.843239  |
|     | F  | -1.561448 | -0.868452 | -1.328701 |
|     | O  | 3.456242  | -0.525860 | -0.113253 |
|     | H  | 4.282991  | -0.063956 | -0.295730 |
|     | Cl | 2.542566  | 2.156158  | 2.050447  |
| TS3 | C  | -1.490317 | 0.586874  | -0.276431 |
|     | C  | -0.029040 | 0.945783  | -0.108283 |
|     | C  | 0.900907  | -0.233850 | -0.162902 |
|     | H  | 0.217017  | 1.647915  | -0.916840 |
|     | H  | 0.077753  | 1.498741  | 0.829762  |
|     | C  | 2.382891  | 0.033982  | -0.165777 |
|     | H  | 0.763360  | -0.934690 | 1.161807  |
|     | H  | 0.591390  | -1.074463 | -0.782942 |
|     | H  | 2.631421  | 0.557183  | -1.100886 |
|     | H  | 2.649120  | 0.714179  | 0.656472  |
|     | F  | -2.258671 | 1.694662  | -0.265835 |
|     | F  | -1.929583 | -0.223873 | 0.704686  |
|     | F  | -1.710907 | -0.047546 | -1.449670 |
|     | O  | 3.160327  | -1.142525 | -0.159837 |
|     | H  | 3.062925  | -1.563120 | 0.702909  |
|     | Cl | 0.915605  | -1.561557 | 2.441468  |
| TS4 | C  | -1.358277 | -0.387139 | -0.115676 |
|     | C  | -0.121733 | 0.466820  | -0.148447 |
|     | C  | 1.202761  | -0.224910 | -0.214712 |
|     | H  | -0.257900 | 1.358132  | -0.759644 |
|     | H  | -0.155467 | 1.145934  | 1.167344  |
|     | C  | 2.401242  | 0.717414  | -0.199533 |
|     | H  | 1.297261  | -0.958797 | 0.590067  |
|     | H  | 1.236400  | -0.798522 | -1.154904 |
|     | H  | 2.289568  | 1.471593  | -0.992650 |
|     | H  | 2.452667  | 1.240302  | 0.763228  |
|     | F  | -2.463063 | 0.347045  | 0.097674  |
|     | F  | -1.296596 | -1.336512 | 0.835057  |
|     | F  | -1.517707 | -1.020653 | -1.305553 |
|     | O  | 3.549359  | -0.091406 | -0.415524 |
|     | H  | 4.331828  | 0.455745  | -0.303284 |
|     | Cl | -0.120281 | 1.851936  | 2.416344  |
| PI  | C  | 1.380168  | 0.015569  | 0.000006  |
|     | C  | 0.036603  | 0.703711  | -0.000263 |
|     | C  | -1.142649 | -0.272634 | -0.000224 |
|     | H  | 0.012241  | 1.351082  | 0.881321  |
|     | H  | 0.012410  | 1.350821  | -0.882038 |
|     | C  | -2.491813 | 0.452246  | -0.000016 |
|     | H  | -1.092385 | -0.919516 | -0.879733 |

|    |   |           |           |           |
|----|---|-----------|-----------|-----------|
|    | H | -1.092208 | -0.919742 | 0.879107  |
|    | H | -2.585473 | 1.136216  | 0.868373  |
|    | H | -2.585366 | 1.137396  | -0.867417 |
|    | F | 2.390562  | 0.912849  | -0.000416 |
|    | F | 1.546115  | -0.771797 | -1.086801 |
|    | F | 1.546142  | -0.770795 | 1.087543  |
|    | O | -3.588556 | -0.357741 | 0.000053  |
| P2 | C | -1.394787 | 0.015957  | -0.015253 |
|    | C | -0.058391 | 0.701403  | -0.154836 |
|    | C | 1.129751  | -0.229713 | 0.110657  |
|    | H | -0.007562 | 1.111535  | -1.166156 |
|    | H | -0.059362 | 1.543369  | 0.543079  |
|    | C | 2.428775  | 0.485050  | -0.027207 |
|    | H | 1.026655  | -0.672216 | 1.114140  |
|    | H | 1.111299  | -1.066770 | -0.594624 |
|    | H | 2.569304  | 1.466939  | 0.423090  |
|    | F | -2.412372 | 0.868822  | -0.271065 |
|    | F | -1.591425 | -0.472038 | 1.231916  |
|    | F | -1.524865 | -1.024785 | -0.869479 |
|    | O | 3.520442  | -0.344295 | -0.067535 |
|    | H | 4.321992  | 0.187320  | -0.081757 |
| P3 | C | 1.300349  | 0.026094  | 0.004617  |
|    | C | 0.223195  | -0.839956 | -0.633153 |
|    | C | -1.104124 | -0.753245 | 0.040996  |
|    | H | 0.161662  | -0.519953 | -1.679520 |
|    | H | 0.605084  | -1.863943 | -0.619498 |
|    | C | -2.028044 | 0.388077  | -0.175481 |
|    | H | -1.354469 | -1.451841 | 0.830037  |
|    | H | -1.741354 | 1.234207  | 0.475976  |
|    | H | -1.938245 | 0.752373  | -1.212485 |
|    | F | 2.479187  | -0.099911 | -0.642650 |
|    | F | 1.515551  | -0.297758 | 1.296284  |
|    | F | 0.969509  | 1.340009  | -0.025962 |
|    | O | -3.356451 | -0.037907 | 0.116903  |
|    | H | -3.907541 | 0.745537  | 0.199338  |
| P4 | C | 1.429762  | 0.031446  | 0.010788  |
|    | C | 0.095643  | 0.574969  | -0.324628 |
|    | C | -1.124680 | -0.267220 | -0.244702 |
|    | H | 0.084567  | 1.548560  | -0.799542 |
|    | C | -2.381912 | 0.533021  | 0.088912  |
|    | H | -1.300747 | -0.769813 | -1.209463 |
|    | H | -0.996792 | -1.063187 | 0.493764  |
|    | H | -2.278841 | 0.982810  | 1.085718  |
|    | H | -2.503211 | 1.348364  | -0.639556 |

|     |           |             |             |             |
|-----|-----------|-------------|-------------|-------------|
|     | F         | 2.370912    | 0.998147    | 0.037861    |
|     | F         | 1.846659    | -0.901719   | -0.890613   |
|     | F         | 1.445363    | -0.585197   | 1.219031    |
|     | O         | -3.476490   | -0.372443   | 0.036393    |
|     | H         | -4.272340   | 0.098439    | 0.299206    |
| R2  | C         | -1.641049   | -0.235391   | 0.008566    |
|     | C         | -0.322368   | 0.585147    | -0.023755   |
|     | C         | 1.001197    | -0.215415   | 0.030408    |
|     | C         | 2.237351    | 0.670975    | 0.181256    |
|     | H         | 2.174565    | 1.471381    | -0.566122   |
|     | H         | 2.227872    | 1.116539    | 1.175183    |
|     | F         | -2.675157   | 0.590992    | -0.189598   |
|     | F         | -1.798004   | -0.834957   | 1.190632    |
|     | F         | -1.644917   | -1.161863   | -0.954987   |
|     | F         | -0.345900   | 1.435418    | 1.036789    |
|     | F         | -0.324901   | 1.325745    | -1.160291   |
|     | F         | 0.922167    | -1.117384   | 1.043529    |
|     | F         | 1.111986    | -0.926547   | -1.137452   |
|     | O         | 3.414846    | -0.089602   | 0.069287    |
|     | H         | 3.420547    | -0.505638   | -0.799803   |
| TS5 | C         | 1.447182    | -0.919487   | 1.104494    |
|     | C         | 0.360243    | 0.071400    | 0.604130    |
|     | C         | -1.061330   | -0.503583   | 0.377640    |
|     | C         | -2.013499   | 0.549751    | -0.212014   |
|     | H         | -2.051687   | 1.440565    | 0.423789    |
|     | H         | -1.615971   | 0.851897    | -1.195545   |
|     | F         | 2.582192    | -0.244743   | 1.316624    |
|     | F         | 1.676380    | -1.865928   | 0.191736    |
|     | F         | 1.068958    | -1.494898   | 2.247858    |
|     | F         | 0.790049    | 0.594303    | -0.575325   |
|     | F         | 0.266842    | 1.079372    | 1.505581    |
|     | F         | -0.975028   | -1.563737   | -0.464374   |
|     | F         | -1.546544   | -0.944348   | 1.563525    |
|     | O         | -3.262902   | 0.015883    | -0.457243   |
|     | H         | -4.190109   | 0.487472    | 0.287928    |
| Cl  | -4.905686 | 0.692994    | 1.517013    |             |
| TS6 | C         | -1.65481900 | -0.13311400 | -0.04450500 |
|     | C         | -0.35404900 | 0.71057700  | -0.18861600 |
|     | C         | 0.97202300  | -0.09312600 | -0.13632700 |
|     | C         | 2.21540100  | 0.73450200  | 0.16176800  |
|     | H         | 2.22009100  | 1.82192100  | -0.68753500 |
|     | H         | 2.20444600  | 1.23391500  | 1.12675600  |
|     | F         | -2.70686700 | 0.63785000  | -0.32989500 |
|     | F         | -1.78915800 | -0.59423800 | 1.20039500  |

|    |    |             |             |             |
|----|----|-------------|-------------|-------------|
|    | F  | -1.63285300 | -1.16549500 | -0.89534900 |
|    | F  | -0.33308300 | 1.61474800  | 0.82470500  |
|    | F  | -0.41655700 | 1.36966600  | -1.36026800 |
|    | F  | 0.85482400  | -1.06003300 | 0.82260600  |
|    | F  | 1.15410600  | -0.73449900 | -1.32744600 |
|    | O  | 3.37720700  | 0.06991500  | -0.04231600 |
|    | H  | 3.30525400  | -0.47692300 | -0.83909400 |
|    | Cl | 2.44411600  | 3.03089700  | -1.56083800 |
| P5 | C  | -1.603220   | -0.224307   | -0.000018   |
|    | C  | -0.272194   | 0.580606    | 0.000008    |
|    | C  | 1.039050    | -0.254506   | 0.000020    |
|    | C  | 2.284249    | 0.673018    | -0.000079   |
|    | H  | 2.203422    | 1.288043    | -0.906814   |
|    | H  | 2.203445    | 1.288199    | 0.906554    |
|    | F  | -2.625554   | 0.638917    | 0.000037    |
|    | F  | -1.692617   | -0.992735   | 1.087727    |
|    | F  | -1.692639   | -0.992621   | -1.087840   |
|    | F  | -0.274229   | 1.373468    | 1.099710    |
|    | F  | -0.274205   | 1.373487    | -1.099681   |
|    | F  | 1.041259    | -1.048734   | 1.096963    |
|    | F  | 1.041193    | -1.048875   | -1.096824   |
|    | O  | 3.399620    | -0.118907   | -0.000020   |
| P6 | C  | -1.612925   | -0.195936   | -0.025973   |
|    | C  | -0.269136   | 0.586119    | -0.025966   |
|    | C  | 1.024076    | -0.256360   | 0.112453    |
|    | C  | 2.227342    | 0.567785    | 0.344573    |
|    | H  | 2.265630    | 1.304120    | 1.130420    |
|    | F  | -2.605309   | 0.641409    | -0.352064   |
|    | F  | -1.871674   | -0.706717   | 1.179242    |
|    | F  | -1.580647   | -1.187276   | -0.923700   |
|    | F  | -0.312793   | 1.469111    | 1.006048    |
|    | F  | -0.201169   | 1.282421    | -1.183486   |
|    | F  | 0.805678    | -1.190468   | 1.112639    |
|    | F  | 1.199181    | -0.985223   | -1.041205   |
|    | O  | 3.418658    | 0.137927    | -0.116740   |
|    | H  | 3.269554    | -0.526497   | -0.804289   |
